# Supplementary material for: Archaea and Bacteria Exposure in Danish Livestock Farmers
Source: PubMed Central journal article supplement — Ann Work Expo Health. 2019 Aug 28;63(9):965–74. doi: 10.1093/annweh/wxz058 (PMC6853703; doi:10.1093/annweh/wxz058), 2019-08-28
Supplement: wxz058_suppl_supplementary-table.pdf [file wxz058_suppl_supplementary-table.pdf]

**Online Supplementary Table**  
**Annals of Work Exposure and Health**

**Archaea and bacteria exposure in Danish livestock farmers**

Jakob Hjort Bønløkke<sup>1</sup>

Caroline Duchaine<sup>2</sup>

Vivi Schlünssen<sup>3,4</sup>

Torben Sigsgaard<sup>3</sup>

Marc Veillette<sup>2</sup>

Ioannis Basinas<sup>5</sup>

Correspondence to

Jakob H. Bønløkke, Department of Occupational and Environmental Medicine, Danish Ramazzini Centre, Aalborg University Hospital, Aalborg, Denmark. E-mail: jahb@rn.dk.

Author affiliations

<sup>1</sup>Department of Occupational and Environmental Medicine, Danish Ramazzini Centre, Aalborg University Hospital, Aalborg, Denmark.

<sup>2</sup>CRIUCPQ and Département de Biochimie, microbiologie et bioinformatique, Université Laval, Quebec City, Canada.

<sup>3</sup>Section of Work, Environment and Health, Department of Public Health, Aarhus University, Denmark.

<sup>4</sup>National Research Center for the Working Environment, Copenhagen, Denmark

<sup>5</sup>Institute of Occupational Medicine, Edinburgh, United Kingdom

**Supplementary table 1.** Production characteristics of farms participating in the study. Summaries are provided in median (range) values.

| Characteristic        | Pig farms               |                  |                   |                            |                  | Cattle farms<br>(n=26)* | Poultry farms  |                     | Mink farms (n=3) |
|-----------------------|-------------------------|------------------|-------------------|----------------------------|------------------|-------------------------|----------------|---------------------|------------------|
|                       | Farrow-to-finish (n=22) | Farrowing (n=15) | Finishing (n=12)* | Breeding improvement (n=4) | Free-range (n=1) |                         | Broilers (n=1) | Layers, (n=2)       |                  |
| Workers, n#           | 4.5 (1-9)               | 3 (1-13)         | 3 (1-4)           | 5.5 (4-11)                 | 4                | 3 (1-9)                 | 6              | 4.5 (4-5)           | 1 (1-2)          |
| Stables, n            | 10 (3-28)               | 8 (5-14)         | 5 (2-9)           | 7.5 (5-8)                  | 5                | 4 (3-9)                 | 12             | 1                   | 14(12-14)        |
| Animals, n            |                         |                  |                   |                            |                  |                         |                |                     |                  |
| Sows                  | 465 (148-1200)          | 670 (310-2200)   |                   | 477 (250-1150)             | 680              |                         |                |                     |                  |
| Young sows            | 75 (0-300)              | 120 (40-450)     |                   | 260 (100-2000)             | 200              |                         |                |                     |                  |
| Weaners               | 1825 (450-6000)         | 2100 (900-10300) | 800 (0-2500)      | 1300 (900-4000)            | 1500             |                         |                |                     |                  |
| Finishers             | 1950 (600-7000)         | 50 (0-480)       | 2030 (600-5700)   | 1278 (500-2400)            | 1000             |                         |                |                     |                  |
| Boars                 | 5 (2-16)                | 6 (3-16)         |                   | 4 (2-5)                    | 3                |                         |                |                     |                  |
| Cows                  |                         |                  |                   |                            |                  | 155 (42-470)            |                |                     |                  |
| Heifers               |                         |                  |                   |                            |                  | 75 (0-400)              |                |                     |                  |
| Calves                |                         |                  |                   |                            |                  | 63 (0-240)              |                |                     |                  |
| Bulls                 |                         |                  |                   |                            |                  | 0 (0-1)                 |                |                     |                  |
| Broilers and hens     |                         |                  |                   |                            |                  |                         | 425000         | 30700 (16400-45000) |                  |
| Mink (breeding stock) |                         |                  |                   |                            |                  |                         |                |                     | 1900 (1800-3100) |
| Land, hectares        | 264 (96-850)            | 168 (0 -550)     | 240 (90-800)      | 409 (175-1200)             | 280              | 178 (42-530)            | 370            | 491 (117- 865)      | 93 (2-120)       |

n, number observed; # Only full time employed; \* includes 2 farms with pig and beef cattle production activities.
